# Supplementary material for: Quantitative Analysis of Bioactive Compounds in Commercial Teas: Profiling Catechin Alkaloids, Phenolic Acids, and Flavonols Using Targeted Statistical Approaches
Source: MDPI journal article supplement (doi:10.3390/foods12163098), 2023-08-17
Supplement: s1 [file s1]

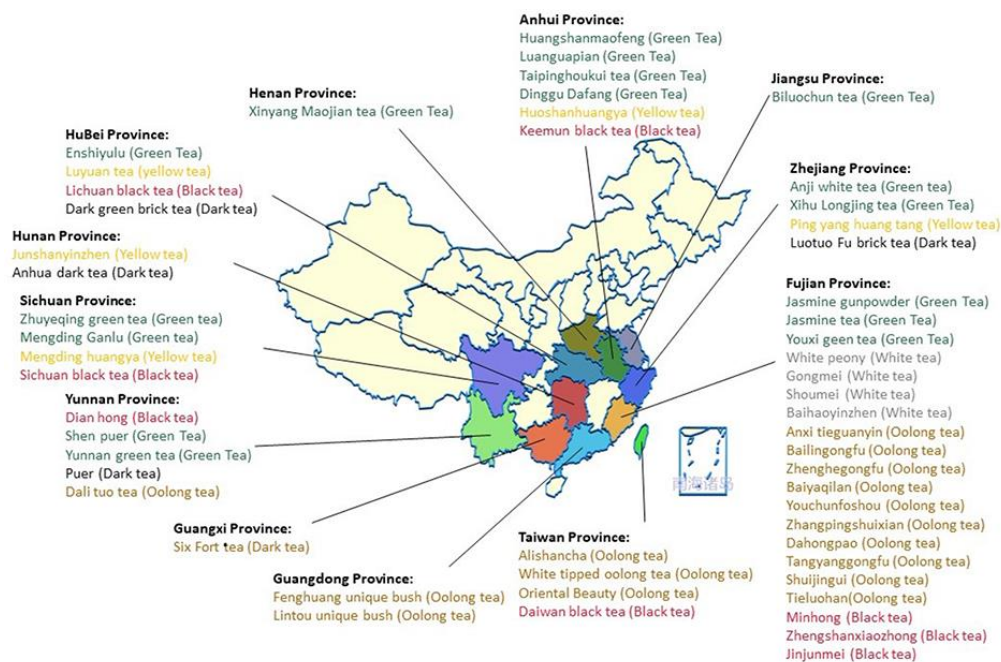

**Figure S1.** Map of China showing the location of all tea sample collection sites. Abbreviation: GT, green tea extracts; OT, Oolong tea extracts; BT, black tea extract; DT, Dark tea extracts (For interpretation of the references to color in this figure legend, the reader is referred to the web version of this article).

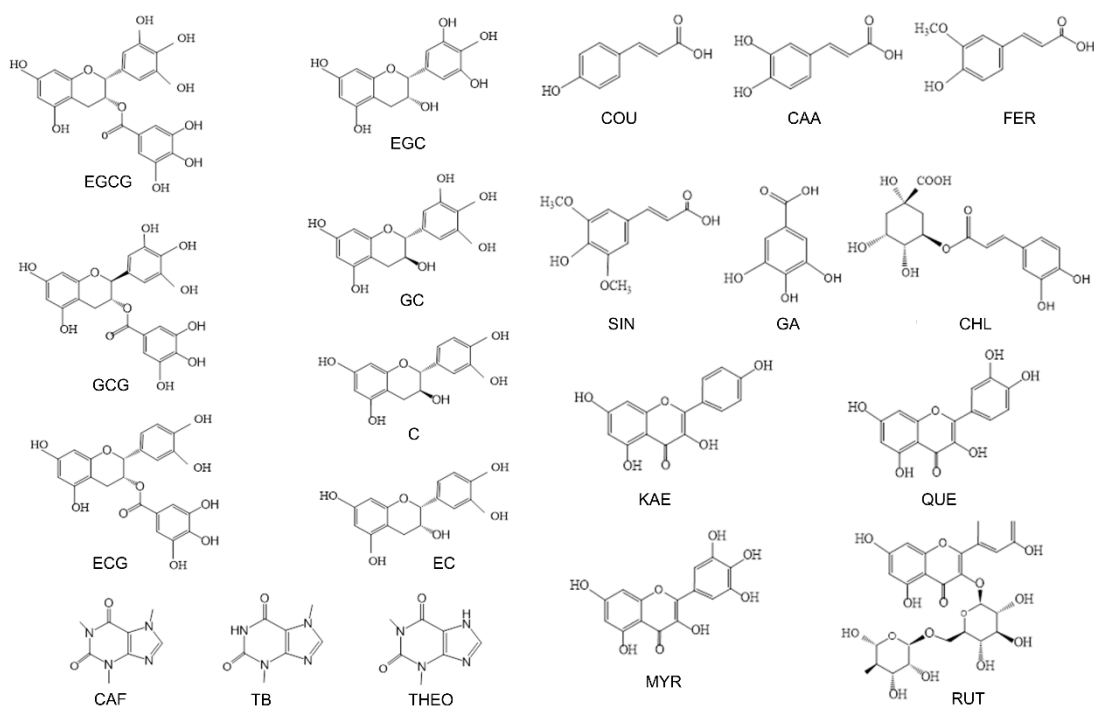

**Figure S2.** Chemical structures of phenolic acids, alkaloids, flavonol and flavonol glycosides in oolong tea.

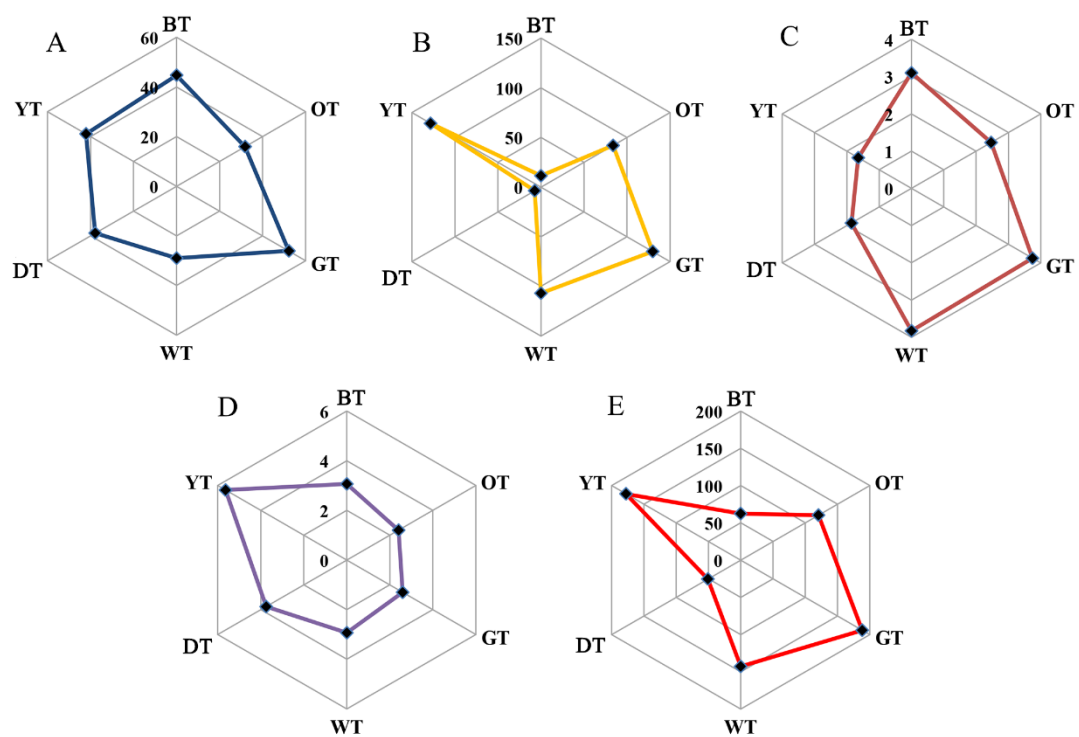

**Figure S3.** Changes of major chemical components in six different types of teas. (A) Alkaloids; (B) Catechins; (C) Flavonols; (D) Phenolic acids; (E) Total chemical components. Tea type: OT, oolong tea; GT, green tea; WT, white tea; DT, dark tea; YT, yellow tea.
